# Supplementary material
Source: PubMed Central journal article supplement (PMC9769366)
Supplement: jvi.01578-22-s0001.pdf [file jvi.01578-22-s0001.pdf]

**TABLE S1** Sequences of primers used in the real-time qPCR assay.

| Primer name      | Sequence (5' – 3')      |
|------------------|-------------------------|
| IFN- $\beta$ -F  | TCTACAGAGCCTTGCCTGCAT   |
| IFN- $\beta$ -R  | TGTCGGTGTCCAAAAGGATGT   |
| IL-6-F           | TTCGACGAGGAGAAATGCTT    |
| IL-6-R           | CCTTATCGTCGTTGCCAGAT    |
| Mx-F             | TGCTGTCCTTCATGACTTCG    |
| Mx-R             | GCTTTGCTGAGCCGATTAAC    |
| OASL-F           | TCTTCCTCAGCTGCTTCTCC    |
| OASL-R           | ACTTCGATGGACTCGCTGTT    |
| cGAS-F           | ATATCTGAGCCAAACGAGT     |
| cGAS-R           | TCGGCTGATAATTTCCGTCT    |
| STING-F          | CCACATCTTGATCCCGCTGA    |
| STING-R          | ATTGCGTAGAGGCTGTGCTT    |
| TBK1-F           | AAAACTGGGGATTTATATGCT   |
| TBK1-R           | CCATCACTAGTACTTTGTGCCTA |
| IRF7-F           | AACATCTCCAACACTGACCC    |
| IRF7-R           | CTCCTGGGATGGTTTGCTCC    |
| $\beta$ -actin-F | GATCACAGCCCTGGCACC      |
| $\beta$ -actin-R | CGGATTCATCATACTCCTGCTT  |
| DEV-UL30-F       | TTTCCTCCTCCTCGCTGAGTG   |
| DEV-UL30-R       | CCAGAAACATACTGTGAGAGT   |
| HVT-UL30-F       | TGCAGAACAAAGAGTATTCCGTA |
| HVT-UL30-R       | CATCCCCTATCTTTACTAGCC   |
| GAPDH-F          | GTCAACGGATTTGGCCGTAT    |
| GAPDH-R          | CCACTTGGACTTTGCCAGAGA   |

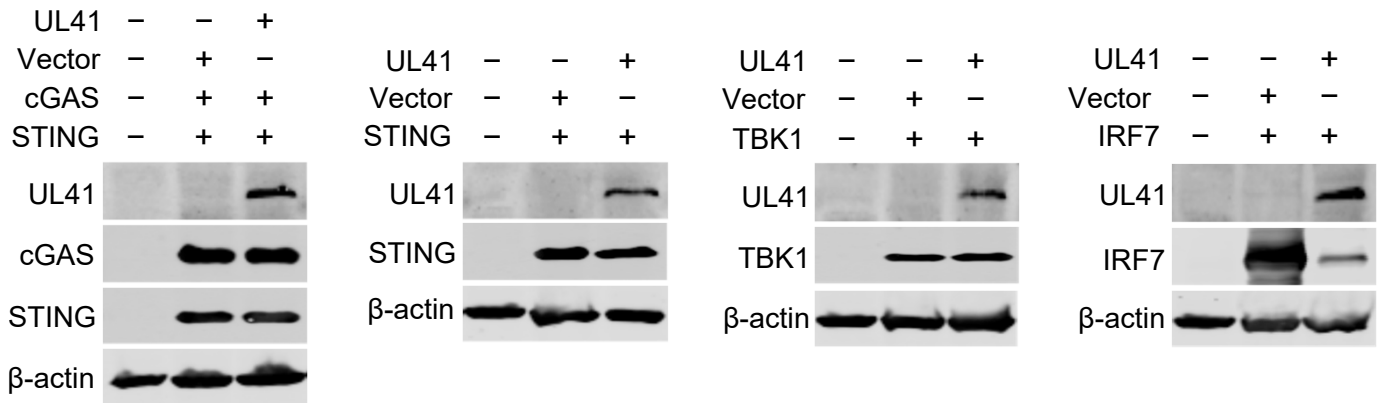

**FIG S1 Western blotting detection of cGAS, STING, TBK1, IRF7, and UL41 expression in DEFs.** DEFs were cotransfected with IFN- $\beta$ -luc reporter, pRL-TK, and cGAS-HA, STING-HA, TBK1-HA, or IRF7-HA along with empty vector or UL41-Flag expression plasmid as indicated. Cells were harvested 36 h after transfection and subjected Western blotting. The expression of cGAS, STING, TBK1, and IRF7 in the transfected cells were detected with anti-HA antibodies, and the UL41 expression was detected with anti-Flag antibody. The expression of  $\beta$ -actin was also detected with anti- $\beta$ -actin antibody.
